# Supplementary material for: Subunit organization and Rab interactions of Vps-C protein complexes that control endolysosomal membrane traffic
Source: PubMed Central journal article supplement — Mol Biol Cell. 2011 Apr 15;22(8):1353–63. doi: 10.1091/mbc.E10-03-0260 (PMC3078060; doi:10.1091/mbc.e10-03-0260), 2011-04-15
Supplement: E10-03-0260_1.pdf [file E10-03-0260_1.pdf]

**Figure S1**

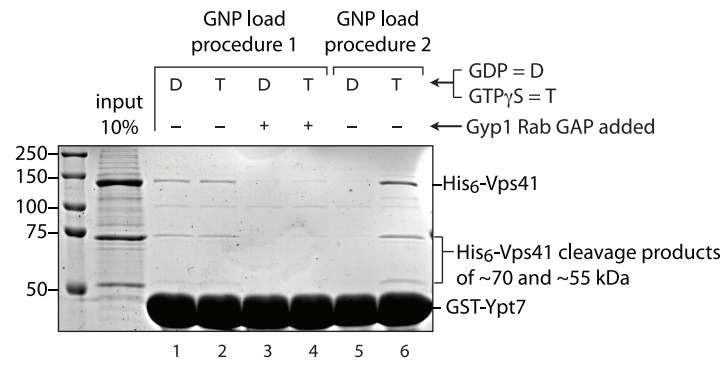

**Figure S2**

**A**

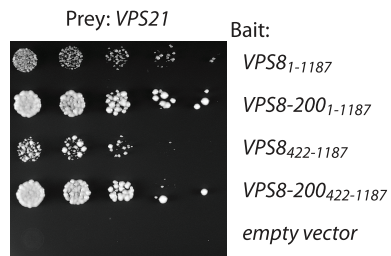

**B**

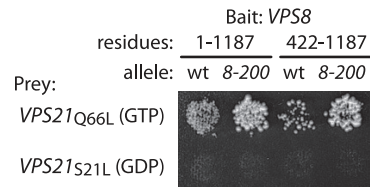

**Supplementary Table 1. Informatic analyses: domain structures of Vps-C/HOPS and Vps-C/CORVET subunits from *Saccharomyces cerevisiae* and *Homo sapiens***

| Protein            | Ref/Systematic | Length      | FW           | DomStart | DomEnd | Method              | Fold/motif          | Model                                 | ModStart | ModEnd | RawSig   | AdjSig |
|--------------------|----------------|-------------|--------------|----------|--------|---------------------|---------------------|---------------------------------------|----------|--------|----------|--------|
| <b>Vps3</b>        | <b>YDR495C</b> | <b>1011</b> | <b>117</b>   | 1        | 140    | Ginzu/msa           |                     |                                       |          |        |          |        |
|                    |                |             |              | 141      | 238    | Ginzu/cutpref       |                     |                                       |          |        |          |        |
|                    |                |             |              | 329      | 416    | Ginzu/msa           |                     |                                       |          |        |          |        |
|                    |                |             |              | 417      | 636    | Ginzu/cutpref       |                     |                                       |          |        |          |        |
|                    |                |             |              | 637      | 853    | Ginzu/cutpref       |                     |                                       |          |        |          |        |
|                    |                |             |              | 854      | 996    | Ginzu/cutpref       |                     |                                       |          |        |          |        |
| <b>Vps8</b>        | <b>VAL002W</b> | <b>1274</b> | <b>145</b>   |          |        |                     |                     |                                       |          |        |          |        |
|                    |                |             |              | 122      | 161    | SMART               | WD40                |                                       |          |        | 2.30E-01 | 0.6    |
|                    |                |             |              | 181      | 224    | SMART               | WD40                |                                       |          |        | 8.70E+01 | -1.9   |
|                    |                |             |              | 1198     | 1265   | SMART               | RING                |                                       |          |        | 1.60E-02 | 1.8    |
|                    |                |             |              | 125      | 161    | pfam motif scan     | WD40                |                                       |          |        | 8.40E-01 | 0.1    |
|                    |                |             |              | 484      | 664    | pfam motif scan     | Clathrin            |                                       |          |        | 5.70E-01 | 0.2    |
|                    |                |             |              | 1001     | 1023   | pfam motif scan     | Vps16_C             |                                       |          |        | 3.00E-01 | 0.5    |
|                    |                |             |              | 1197     | 1268   | pfam motif scan     | PHD                 |                                       |          |        | 2.40E-01 | 0.6    |
|                    |                |             |              | 1231     | 1265   | pfam motif scan     | zf-C4HC4            |                                       |          |        | 6.20E-02 | 1.2    |
|                    |                |             |              | 508      | 665    | Ybe et al.          | Clathrin (1 of 2)   |                                       |          |        |          |        |
|                    |                |             |              | 915      | 1092   | Ybe et al.          | Clathrin (2 of 2)   |                                       |          |        |          |        |
| <b>Vps11/Pep5p</b> | <b>YMR231W</b> | <b>1029</b> | <b>117.5</b> |          |        |                     |                     |                                       |          |        |          |        |
|                    |                |             |              | 1        | 399    | Manual/pdbblast     | B-propellor         | INR0A Aip1p ortholog                  | 151      | 529    | 3.11E+01 | 31.1   |
|                    |                |             |              | 1        | 421    | Ginzu/pdbblast      | B-propellor         | INR0A Aip1p ortholog                  | 151      | 557    | 3.52E+01 | 35.2   |
|                    |                |             |              | 422      | 722    | Manual/Ginzu/2djury | A-solenoid          | IBK5a Srp1p karyopherin alpha         | 1        | 359    | 1.02E+00 | 1.0    |
|                    |                |             |              | 723      | 1187   | Ginzu/pdbblast      | A-solenoid          | IB89a Clathrin proximal leg           | 25       | 443    | 2.45E+01 | 24.5   |
|                    |                |             |              | 1188     | 1274   | Ginzu/ffas03        |                     | 1V87a RING finger from mouse Deltex 2 | 5        | 95     | 2.45E+00 | 2.5    |
|                    |                |             |              | 882      | 913    | SMART               | coiled-coil         |                                       |          |        |          |        |
|                    |                |             |              | 927      | 973    | SMART               | PHD                 |                                       |          |        |          |        |
|                    |                |             |              | 928      | 972    | SMART               | RING                |                                       |          |        |          |        |
|                    |                |             |              | 373      | 432    | pfam motif scan     |                     |                                       |          |        | 3.20E-03 | 2.5    |
|                    |                |             |              | 406      | 555    | pfam motif scan     | pre:CLATHRIN_REPEAT |                                       |          |        | 2.50E-05 | 4.6    |
|                    |                |             |              | 928      | 972    | pfam motif scan     | prf:ZF_RING_2       |                                       |          |        | 1.10E-03 | 3.0    |
|                    |                |             |              | 943      | 975    | pfam motif scan     | pfam_fs:PHD         |                                       |          |        | 1.60E-06 | 5.8    |
|                    |                |             |              | 928      | 972    | pfam motif scan     | pfam_fs:zf-C3HC4    |                                       |          |        | 5.50E-04 | 3.3    |
|                    |                |             |              | 927      | 975    | pfam motif scan     | pfam_ls:PHD         |                                       |          |        | 2.10E-04 | 3.7    |
|                    |                |             |              | 928      | 972    | pfam motif scan     | pfam_ls:zf-C3HC4    |                                       |          |        | 4.10E-04 | 3.4    |
|                    |                |             |              | 460      | 583    | Ybe et al.          | Clathrin            |                                       |          |        |          |        |
|                    |                |             |              | 364      | 505    | Ginzu/pdbblast      | A-bundle            | 1NA0a engineered TPR A-helix array    | 50       | 105    | 3.52E+00 | 3.5    |

|               |                |            |              |      |                 |                   |  |                                       |     |     |           |       |
|---------------|----------------|------------|--------------|------|-----------------|-------------------|--|---------------------------------------|-----|-----|-----------|-------|
|               |                |            | 506          | 925  | G.inzu/3Djury   | A-solenoid        |  | 1EJLI Mouse importin alpha            | 8   | 391 | 2.07E+00  | 2.1   |
|               |                |            | 1            | 350  | Manual/pdbblast | B-propeller       |  | IGG2b G-beta                          |     |     | 3.94E+01  | 39.4  |
|               |                |            | 926          | C    | Manual/pdbblast | RING C3HC4        |  | LJM7b Brca1BARD1 RING                 |     |     | 4.00E+00  | 4.0   |
|               |                |            | 1            | 349  | Manual          | B-propeller       |  |                                       |     |     |           |       |
|               |                |            | 350          | 926  | Manual          | A-solenoid        |  |                                       |     |     |           |       |
|               |                |            | 926          | 1029 | Manual          | RING              |  |                                       |     |     |           |       |
|               |                |            |              |      |                 |                   |  |                                       |     |     |           |       |
| <b>hVPS11</b> | <b>Q9H270</b>  | <b>941</b> | <b>107.8</b> | 860  | SMART           | RING              |  |                                       |     |     | 6.00E-05  | 4.2   |
|               |                |            | 822          | 860  | pfam motif scan | zf-C3HC4          |  |                                       |     |     | 2.10E-03  | 2.7   |
|               |                |            | 1            | 72   | G.inzu/pdbblast |                   |  | IP22a Beta-TrCP1 WD40 domain          | 143 | 159 | 4.24E+01  | 42.4  |
|               |                |            | 73           | 337  | G.inzu/pdbblast |                   |  | IP16a yeast AIp1p                     | 55  | 304 | 1.42E+01  | 14.2  |
|               |                |            | 338          | 715  | G.inzu/pdbblast | A-solenoid        |  | IB89a Clathrin proximal leg           | 133 | 449 | 3.11E+01  | 31.1  |
|               |                |            | 716          | 941  | G.inzu/pdbblast |                   |  | IFBVa c-Cbl SH2-like and RING domains | 235 | 378 | 5.00E+00  | 5.0   |
|               |                |            | 716          | 861  | G.inzu/pdbblast |                   |  | IFBVa c-Cbl SH2-like and RING domains | 235 | 378 | 5.00E+00  | 5.0   |
|               |                |            | 862          | 941  | G.inzu/3Djury   |                   |  | ISFFa Gamma-Aminobutyrate Aminotrans  | 313 | 381 | 1.02E+00  | 1.0   |
| <b>Vps16p</b> | <b>YPL045W</b> | <b>798</b> | <b>92.7</b>  | 4    | SMART           | pfam:VPS16N       |  |                                       |     |     | 8.00E-216 | 215.1 |
|               |                |            | 478          | 798  | SMART           | pfam:VPS16C       |  |                                       |     |     | 1.60E-193 | 192.8 |
|               |                |            | 4            | 379  | pfam motif scan | pfam_fs:Vps16_N   |  |                                       |     |     | 6.60E-218 | 217.2 |
|               |                |            | 478          | 798  | pfam motif scan | pfam_fs:Vps16_C   |  |                                       |     |     | 1.40E-193 | 192.9 |
|               |                |            | 1            | 395  | G.inzu/ffas03   | B-propeller       |  | ITYQc p40 of Arp2/3 complex           | 1   | 372 | 2.18E+00  | 2.2   |
|               |                |            | 1            | 530  | G.inzu/ffas03   | B-propeller       |  | INR0A Aip1p ortholog                  | 74  | 606 | 2.30E+00  | 2.3   |
|               |                |            | 396          | 798  | G.inzu/3Djury   | A-solenoid/bundle |  | IN1Ba bornyl diphosphate synthase     | 62  | 489 | 2.06E+00  | 2.1   |
|               |                |            | 531          | 798  | G.inzu/3Djury   | A-solenoid        |  | LIB2a Pumilio-1 PUM repeat            | 26  | 296 | 2.06E+00  | 2.1   |
|               |                |            | 1            | 285  | Manual/3Djury   | B-propeller       |  | IG0Tb Transducin beta                 | 25  | 331 | 4.91E+00  | 4.9   |
|               |                |            | 1            | 308  | Manual/ffas03   | B-propeller       |  | IERJa Tup1 WD40 domain                | 36  | 392 | 4.95E+00  | 5.0   |
|               |                |            | 285          | 798  | Manual/3Djury   | A-solenoid        |  | IEE4a Srp1p karyopherin alpha         |     |     | 2.05E+00  | 2.0   |
|               |                |            | 1            | 307  | Manual          | B-propeller       |  |                                       |     |     |           |       |
|               |                |            | 308          | 798  | Manual          | B-propeller       |  |                                       |     |     |           |       |
| <b>hVPS16</b> | <b>Q9H269</b>  | <b>839</b> | <b>94.6</b>  | 4    | SMART           | pfam:Vps16_N      |  |                                       |     |     | 4.60E-270 | 270.0 |
|               |                |            | 517          | 835  | SMART           | pfam:Vps16_N      |  |                                       |     |     | 2.10E-202 | 202.0 |
|               |                |            | 4            | 420  | pfam motif scan | pfam_fs:Vps16_N   |  |                                       |     |     | 3.50E-271 | 270.5 |
|               |                |            | 517          | 835  | pfam motif scan | pfam_fs:Vps16_C   |  |                                       |     |     | 1.60E-203 | 202.8 |















**Table S4. Phenotypes resulting from HOPS/CORVET truncations**

| <b>A. CPY and ALP maturation</b>    |                   |               |
|-------------------------------------|-------------------|---------------|
| <b>Genotype</b>                     | <b>CPY</b>        | <b>ALP</b>    |
| Wild-type                           | Mature            | Mature        |
| <i>pep4Δ prb1Δ</i>                  | Pro [p2]          | Pro-          |
| <i>vps11<sup>736Δ</sup></i>         | Pro [p2]          | Pro-          |
| <i>vps11<sup>926Δ</sup> (ΔRING)</i> | Mature            | Pro-          |
| <i>vps18<sup>826Δ</sup> (ΔRING)</i> | Pro [p2]          | Pro-          |
| <i>vps8<sup>1188Δ</sup> (ΔRING)</i> | Mature & Pro [p2] | Mature        |
| <i>vps3<sup>900Δ</sup></i>          | Pro [p2]          | Mature & Pro- |
| <i>vps39<sup>860Δ</sup></i>         | Mature & Pro [p2] | Pro-          |
| <i>vps39<sup>979Δ</sup> (ΔRING)</i> | Mature & Pro [p2] | Mature & Pro- |

| <b>B. CPY missorting</b>            |                                |
|-------------------------------------|--------------------------------|
| <b>Genotype</b>                     | <b>CPY-invertase secretion</b> |
| Wild-type                           | None                           |
| <i>pep4Δ prb1Δ</i>                  | None                           |
| <i>vps3Δ</i>                        | Strong                         |
| <i>vps3<sup>900Δ</sup></i>          | Strong                         |
| <i>vps11Δ</i>                       | Strong                         |
| <i>vps11<sup>1-735Δ</sup></i>       | Strong                         |
| <i>vps11<sup>926Δ</sup> (ΔRING)</i> | Weak                           |

| <b>C. Complementation of <i>vps11<sup>735Δ</sup></i> sorting defects by <i>vps11<sup>736-1029</sup></i></b> |            |            |                |
|-------------------------------------------------------------------------------------------------------------|------------|------------|----------------|
| <b>Genotype</b>                                                                                             | <b>CPY</b> | <b>ALP</b> | <b>GFP-CPS</b> |
| Wild-type                                                                                                   | Mature     | Mature     | Vacuole lumen  |
| <i>vps11Δ</i>                                                                                               | Pro [p2]   | Pro-form   | N/A            |
| <i>vps11<sup>735Δ</sup></i>                                                                                 | Pro [p2]   | Pro-form   | N/A            |
| <i>vps11<sup>736-1029</sup></i>                                                                             | Pro [p2]   | Pro-form   | N/A            |
| <i>vps11<sup>735Δ</sup> + vps11<sup>736-1029</sup></i>                                                      | Mature     | Mature     | Vacuole lumen  |

**Table S5 Strains used in this study**

| <b>Strain</b> | <b>Genotype</b>                                                                                                  | <b>Source</b>                    |
|---------------|------------------------------------------------------------------------------------------------------------------|----------------------------------|
| PJ694a        | <i>MATa trp1-901, leu2-3,112, ura3-52, his3-200 gal4Δ, gal80Δ, LYS2::GAL1-HIS3, GAL2-ADE2, met2::GAL7, -lacZ</i> | James <i>et al.</i> , 1996       |
| PJ694α        | <i>MATa trp1-901, leu2-3,112, ura3-52, his3-200 gal4Δ, gal80Δ, LYS2::GAL1-HIS3, GAL2-ADE2, met2::GAL7, -lacZ</i> | James <i>et al.</i> , 1996       |
| BY4742        | <i>MATa his3Δ1 leu2Δ0 lys2Δ0 ura3Δ0</i>                                                                          | ATCC                             |
| AMY942        | BY4742; <i>vps39Δ::KanMX4</i>                                                                                    | This study                       |
| AMY885        | BY4742; <i>vps39-860Δ::URA3</i>                                                                                  | This study                       |
| AMY886        | BY4742; <i>vps39-979Δ::URA3</i>                                                                                  | This study                       |
| AMY1106       | BY4742; <i>vps11Δ::KanMX4</i>                                                                                    | This study                       |
| AMY1107       | BY4742; <i>vps11-350Δ::KanMX4</i>                                                                                | This study                       |
| AMY1108       | BY4742; <i>vps11-445Δ::KanMX4</i>                                                                                | This study                       |
| AMY1109       | BY4742; <i>vps11-505Δ::KanMX4</i>                                                                                | This study                       |
| AMY1199       | BY4742; <i>vps11-735Δ::KanMX4</i>                                                                                | This study                       |
| AMY1198       | BY4742; <i>vps11-926Δ::KanMX4</i>                                                                                | This study                       |
| BJ8987        | <i>MATa vps8-200 ura3-52 trp1 leu2Δ1 his3Δ200</i>                                                                | Jones <i>et al.</i> , 1998       |
| BJ4490        | <i>MATa pep5 (vps11Δ445)::TRP1 vps8-200 leu2Δ1 trp1Δ101</i>                                                      | Jones <i>et al.</i> , 1998       |
| BJ6919        | <i>MATa pep5 (vpsΔ445)::TRP1 leu2Δ1 trp1 ade6</i>                                                                | Jones <i>et al.</i> , 1998       |
| BJ8866        | <i>MATa leu2Δ1 ura3-52 trp1</i>                                                                                  | Jones <i>et al.</i> , 1998       |
| AMY1113       | <i>MATa vps8-200 ura3-52 trp1 leu2Δ1 his3Δ200 vps11-445Δ::KanMX4</i>                                             | This study                       |
| SEY6210       | <i>MATa leu2-3,112 ura3-52 his3-Δ200 trp1-Δ901 lys2-801 suc2-Δ9</i>                                              | Robinson <i>et al.</i> , 1988    |
| BHY10         | <i>MATa leu2-3,112 ura3-52 his3-Δ200 trp1-Δ901 lys2-801 suc2-Δ9 CPY-invertase::LEU2</i>                          | Horazdovsky <i>et al.</i> , 1994 |
| DNY356        | <i>MATa leu2-3,112 ura3-52 his3-Δ200 trp1-Δ901 lys2-801 suc2-Δ9 CPY-invertase::LEU2 vps11Δ::KanMX4</i>           | This study                       |
| DNY357        | <i>MATa leu2-3,112 ura3-52 his3-Δ200 trp1-Δ901 lys2-801 suc2-Δ9 CPY-invertase::LEU2 vps11-926Δ::KanMX4</i>       | This study                       |
| DNY358        | <i>MATa leu2-3,112 ura3-52 his3-Δ200 trp1-Δ901 lys2-801 suc2-Δ9 CPY-invertase::LEU2 vps11-735Δ::KanMX4</i>       | This study                       |
